# Supplementary material for: Transcriptome and Metabolome Integrated Analysis of Two Ecotypes of Tetrastigma hemsleyanum Reveals Candidate Genes Involved in Chlorogenic Acid Accumulation
Source: MDPI journal article supplement (doi:10.3390/plants10071288), 2021-06-24
Supplement: s1 [file s1]

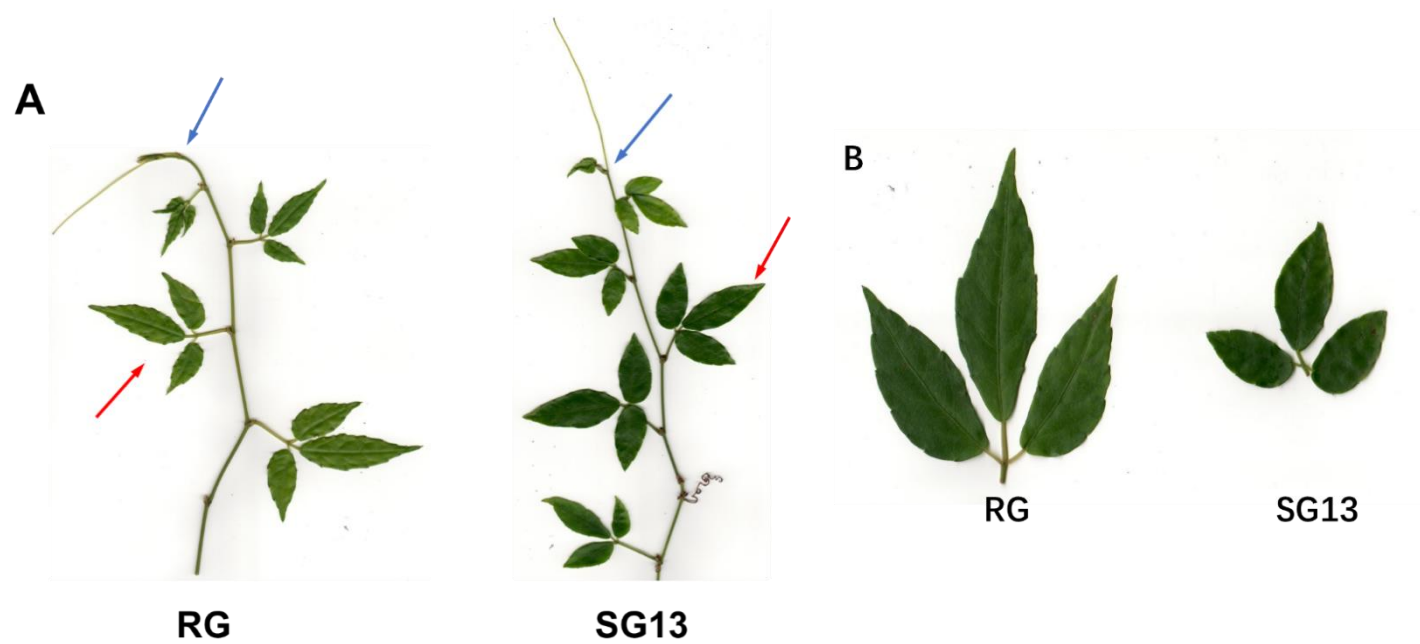

Figure. S1 Phenotypes of medium-sized-leaf SYQ and small SYQ.

(A) Red arrows indicate the leaves collected for analysis; blue arrows indicate the top of stem.

(B) Exhibited representative leaves of RG and SG13.

Towards plant salinity tolerance-implications from ion transporters and biochemical regulation

Table S1. Information of genes and primers for qRT-PCR

| Accession number | Function prediction | Primer Sequences(5' to 3') |
|------------------|---------------------|----------------------------|
|                  | SYQ EF1 $\alpha$    | CGGGCAAGTCCACCACTACT       |
|                  |                     | CATCTCAGCAGCCTCCTTCTCAA    |
| c102511.graph_c0 | SYQ CCoAOMT         | CAAGAGACTGATCGATTTGGTGAAG  |
|                  |                     | GTTCCAGAGGGTGTTGTCGTA      |
| c94054.graph_c0  | SYQ C3H             | GACCTTAGTGAGGACACCATTATTG  |
|                  |                     | CAGCTCTGCCATTGCCCATT       |
| c103381.graph_c0 | SYQ PAL             | CATTGATCTGAGGCACTTGGAG     |
|                  |                     | CTCGCCATTGAAGCCGATTGTTA    |
| c100482.graph_c0 | SYQ HCT             | GGTAAAGTACGACAGGCGATAG     |
|                  |                     | GAGCACCCAACAGTGTGGAAATT    |
| c78409.graph_c0  | SYQ HCT             | GAGATCCAGCACCCAAAGAAC      |
|                  |                     | CTGACACCCACTCCTCCA         |

|                  |         |                        |
|------------------|---------|------------------------|
| c100085.graph_c0 | SYQ CSE | GACAACAAGATGGTCGGAAAGG |
|                  |         | GCCGTGGATTCGACGCTAT    |

## Table S2

Table S2. Sequence information of candidate genes

|                  |                                                                                                                                                                                                                                                                                                                                                                                                                                                                                                                                                                                                                                                                                                                     |
|------------------|---------------------------------------------------------------------------------------------------------------------------------------------------------------------------------------------------------------------------------------------------------------------------------------------------------------------------------------------------------------------------------------------------------------------------------------------------------------------------------------------------------------------------------------------------------------------------------------------------------------------------------------------------------------------------------------------------------------------|
| CCoAOMT          | ATGGCCCAGAACCAGAGCCAAGAAGTTGGGAGGCACCAGGAGGTCGGCCACAAGAGCCTTTTGCAGAGTGATGCTC                                                                                                                                                                                                                                                                                                                                                                                                                                                                                                                                                                                                                                        |
| c102511.graph_c0 | TTTATCAGTATATACTCGATACCAGTGTGTACCCAAGAGAGCCGGAAAGCATGAAGGAGCTAAGAGATTTGACCTCCA<br>AGCATCCATGGAACATCATGACTACGTCTGCAGATGAAGGGCAGTTCTTGAAGTTGCTTCTCAAGCTCATCAATGCCA<br>AGAACACCATGGAGATCGGCGTCTACACCGGCTACTCCCTTCTGGCCACCGCCCTTGCTCTCCCCGACGACGGAAAG<br>ATCCTGGCTATGGACATCAACAAAGAAAATTACGAGCTGGGTCTGCCGGTGATTGAGAAAGCAGGGGTTGCCACAA<br>GATCGACTTCAGGGAGGGCCCTGCTTTGCCTGTTCTTGATCAGATGATCGAAGATGGGAAGTATCACGGGTCGTTCTGA<br>CTTCATATTCGTGGACGCCGACAAGGACAACCTATCTGAACTACCACAAGAGACTGATCGATTTGGTGAAGGTGGGAGG<br>ATTGATCGGCTACGACAACACCCTCTGGAACGGCTCGGTGGTGGCGCCACCCGATGCGCCGCTGCGGAAGTACGTCA<br>GGTACTACAGAGACTTCGTGTTGGAGCTCAACAAGGCTCTCGCTGCTGACCCTAGGATCGAGATCTGCATGCTTCCGG<br>TCGGCGACGGGATCACCTCTGCCGTCGCCTTAGCTGA |
| C3H              | ATGAACTCGAAGGGTGAATTGGACGAGCAGGGTTTGGAATTCAAGGCTATCGGGGCCGATGGGTCAAAGATCAGCGC<br>ATCAGTAACCGAGTACATGCCATGGCTTCGTTGGATGCTCCCCCTTGAGGATGAGGCGCTTGCCAACTCAATGCCCCG                                                                                                                                                                                                                                                                                                                                                                                                                                                                                                                                                     |

|                         |                                                                                                                                                                                                                                                                                                                                                                                                                                                                                                                                                                                                                                                                                                                                                                                                                                                                                                                                                                                                                                                                                                                                                                                |
|-------------------------|--------------------------------------------------------------------------------------------------------------------------------------------------------------------------------------------------------------------------------------------------------------------------------------------------------------------------------------------------------------------------------------------------------------------------------------------------------------------------------------------------------------------------------------------------------------------------------------------------------------------------------------------------------------------------------------------------------------------------------------------------------------------------------------------------------------------------------------------------------------------------------------------------------------------------------------------------------------------------------------------------------------------------------------------------------------------------------------------------------------------------------------------------------------------------------|
| c94054.graph_c0         | TCGAAACCGACTCACTACAATTATCATGGAGGAACACACCCTTACCCGCCACATAACCGGTGGTGCCGAGCAGCATTT<br>TGTGGATGCTTTGCTCACCCTTCAAGATGAATATGACCTTAGTGAGGACACCATTATTGGGCTACTTTGGGATATGATTG<br>TTGCAGGAAGGGATACAACCTTCCATTTAGTTGAATGGGCAATGGCAGAGCTGATGAAGAACCCAAGGATCCAACTA<br>AAGGTTCAAGCTGAATTGGATCATGTAATCGGGGACCGGGTCATGACAGAATCTGATTTCCCCAACCTTCCTTACCTAC<br>AATGT                                                                                                                                                                                                                                                                                                                                                                                                                                                                                                                                                                                                                                                                                                                                                                                                                                |
| PAL<br>c103381.graph_c0 | ATGGAAGCAATGAATCGTCAGGGAAGCAACAAGGTGGAGAGTTTCTGCGTGAGCGATCCACTGAACTGGGGAGCGG<br>CGGCGGAGACGTTGAAGGGGAGCCATTTGGATGAAGTGAAGCGCATGGTGGCGGAGTACCGGAAACCGGTGGTTTCG<br>CCTCGGCGGTGAGACGCTTACGATATCCCAAGTGGCGGCTATCGCCCGGCGGGCGGAGGAGGTGAGTGTGAGTTGT<br>CGGAAGCGGCAAGAGCCGGCGTGAAGGCCAGCAGTGAAGTGGTATGGACAGCATGAACAAGGGTACGGACAGCTA<br>TGGCGTCACCACCGGTTTCGGTGCAACCTCCACAGAAGAACCACAAACAAGGCGGAGCCCTTCAAAGGGAGCTTATCA<br>GGTTCTTGAATGCGGGAATCTTCGGAAATGGTACAGAATCTTGCCACACCCTGCCTCAGTCAGCAACAAGGGCGTCG<br>ATGCTGGTGAGGGTCAACACATTACTTCAAGGATACTCAGGCATCAGATTTGAGATATTGGAGGCCATCACCAAGCTC<br>ATCAACCACAACGTCACCCCATGCTTGCCTCTCCGGGGAACCATCACTGCCTCCGGCGACCTTGTTCTCTCTCATACA<br>TAGCGGGGCTTCTGATCGGGAGGCCGAGCGCCAAGGCGGTGGGCCCCGACGGGAAGCCCCTCAATGCCGAGGAGGC<br>ATTCCATGTGGCTGGAATCAAGGGCGGGTTCTTTGAATTGCAGCCCAAGGAGGGGCTTGCTCTAGTCAACGGCACTGC<br>TGTTGGTTCTGCCATGGCCTCCATGGTTCTCTTTGAAGCTAACATCCTCGCAGTCCTGTCCGAAGTTCTGTCTGCACTT<br>TTTGCCGAAGTCATGCAAGGAAAACCCGAATTCACAGACCACCTCACTCACAAGTTGAAGCATCATCCGGGCCAAAT<br>TGAGGCTGCAGCTATTATGGAACACATTCTAGACGGAAGCTCTTACGTTAAAGCAGCTCAGAAGCTGCACGAGATGGA<br>TCCATTACAGAAACCTAAACAAGATCGATACGCCCTCCGAACATCTCCCCAATGGCTAGGCCCTCAGATTGAAGTTATC |

|                             |                                                                                                                                                                                                                                                                                                                                                                                                                                                                                                                                                                                                                                                                                                                                                                                                                                                                                                                                                                                                                                                                                                                                                    |
|-----------------------------|----------------------------------------------------------------------------------------------------------------------------------------------------------------------------------------------------------------------------------------------------------------------------------------------------------------------------------------------------------------------------------------------------------------------------------------------------------------------------------------------------------------------------------------------------------------------------------------------------------------------------------------------------------------------------------------------------------------------------------------------------------------------------------------------------------------------------------------------------------------------------------------------------------------------------------------------------------------------------------------------------------------------------------------------------------------------------------------------------------------------------------------------------|
|                             | AGAGCAGCAACCAAGTCCATTGAACGGGAGATAAACTCCGTAAATGACAACCCCTTGATCGATGTTTCCAGGGATAAG<br>GCTATTCATGGTGGTAATTTCCAGGGGACCCCAATCGGTGTTTCCATGGACAACACCAGGCTTGCCATTGCTGCTATTG<br>GAAAGCTTATGTTTGCCCAATTCTCCGAGCTTGTTAATGACTTCTACAACAACGGGTTGCCTTCAAATCTGTCCGGTGG<br>CCGGAACCCGAGCTTGGACTIONACGGCTTCAAAGGGGCCGAGATCGCGATGGCCTCTTACTGTTTCGGAGCTGCAGTTTCT<br>TGCTAATCCTGTCAACCAACCATGTCCAGAGCGCTGAGCAGCACAACCAAGATGTGAACTCTTTAGGACTTATTTCTTC<br>GAGAAAACTGCTGAGGCTGTGGATATACTGAAGCTGATGTCATCCACTTTCTTGATTGCTTTATGCCAATCCATTGATC<br>TGAGGCACTTGAGGAGAATCTCAAGAACACAGTGAAGAACACTGTCTGCCAAGTGGCCAAGAGAGTGTTAACAAT<br>CGGCTTCAATGGCGAGCTTCACCCTTCCCGGTTCTGCGAGAAGGACCTGCTCAAGATGGTCGACAGAGAACATGTTTT<br>CGCATACATTGACGATCCCTGCAGCTCCACTTATCCATTGATGCAGAAGCTAAGGCAAGTCCTGGTCGAGCATGCCCTG<br>AACAAATGGAGAAAGGGAGAAGAACTCCAGCACTTCCATCTTCCAAAAGATCGTAGCCTTTGAGGATGAACTAAAAGC<br>CCTTCTGCCCAAGGAAGTGGAGAGCACAAGAATCGACTACGAGAATGGAAATTCTGCCATTCCAAACAGAATCAACG<br>ACTGCAGATCCTACCCTCTTTACAAATTTGTGAGGGAAGAACTGGGAGCAAGATTCCTAACGGGAGAGAAGACTACA<br>TCCCCAGGTGAAGAATGTGACAAGGTCTTCACAGCAATGTGTGCTGGGAAGTTGATTGATCCGCTGCTGGATTGTCTG<br>AAGGAGTGGAATGGAGCTCCTCTTCCCATCTGCTAG |
| HCT<br><br>c100482.graph_c0 | ATGGCGAAATTGATGGCAACCTACACAGTAAAACCAGCCAAGGAGACACCAGGAGGCTACAAATGTTTATCAGAGTG<br>TGATCAAATCAAAGCTGTCACTCACGCCCCCACCATCTACTTTTACCCACCTGGAAATTTGTCGCTTGAGACGGTCGCC<br>GACATTCTGAGAAACTCTTTGAGTGAGGCTTTGGCCATTTTCTATCCACTGGCCGGACGGCTGCACATTATCGATAGCG<br>GCGGCCGCCTTAAGCTCGACTGCAATGCGGCGGGGGCTTTGCTCGTTGCAGTCGAATCGGAAGCTAAAATCGATGACT<br>TTGGAGATTTAGACCAACCCCGGAAATCCGAGCTCTCATCCCTCGCGTGGATTACAACAAGCCGATAGATGAACTGC                                                                                                                                                                                                                                                                                                                                                                                                                                                                                                                                                                                                                                                                                                                             |

|                                   |                                                                                                                                                                                                                                                                                                                                                                                                                                                                                                                                                                                                                                                                                                                                                                                                                                                                                                                                                                                                                                                                        |
|-----------------------------------|------------------------------------------------------------------------------------------------------------------------------------------------------------------------------------------------------------------------------------------------------------------------------------------------------------------------------------------------------------------------------------------------------------------------------------------------------------------------------------------------------------------------------------------------------------------------------------------------------------------------------------------------------------------------------------------------------------------------------------------------------------------------------------------------------------------------------------------------------------------------------------------------------------------------------------------------------------------------------------------------------------------------------------------------------------------------|
|                                   | <p>CGTTGCTGGTGGTGCAGGTCACGAAATTCAGCTGCGGCGGACTGAGTCTGGGCTTGGGAATATCGCATATTCTCGTGG<br/> ACGGCCTTTCTGCATTAGATTTTCATCTCCGAGTGGGCTAAAATAGCCCGCGGCGAGGGCCCCGGCAGCCCCCGCCGT<br/> TTCTTGATCGGTCCGTTTTCCGAGCGCCGGAGCATTGACGGCGCCCGTGTTTGATCATCCAGATTTTGGTCCTCAGCC<br/> CCTCTTGATTGGGCAGAAAGATGACGTGGAAGAAAGAAAGAAAGAAACCTCAGTTCTCTTGTTGAAGTTAAGCAAA<br/> GTGCAGACCGAGAAATTGAAGGAAAAGGCCAACGAGGATGAAAACGTTTCCAATGGCCGGCGGCCGTACACAAGGT<br/> ACGAGGCTGTTGCCGGACACATATGGAGGACAGCATGCAAGGCACGTCAGCATGAAGCCAATCAGCCGACATCGTTG<br/> TATATCGCCGTTGATGCTCGCAACCGCATGGAGCCGCCATTGCCGCCGAGGTATTTCCGAAATGCTGTTTTTCGGATAA<br/> CTGCTGAAAGCACGTCAGGGGAGCTGGTGTCAAAGTCGTTAGGATATGCTTCTGGTAAAGTACGACAGGCGATAGAG<br/> AAGGCAACGCCTGAATATTTACAATCATGTCTTGTGTTTGTGAAAAATCAGAAAGATGTGACCAAGTTTAGGAATTTCC<br/> ACACTGTTGGGTGCTCGAAAGGAGCATTTTATGGAAACCCTAGTATTGAGATCACTAGCTGGGCAAGGTTACCCGTCT<br/> ATGGGGCGGATTTCCGATGGGGCCGGGAAATATACATGGGTCTTGGAGATTTAGGGTTTGATGGGAAGGTTTTCTTGAT<br/> TCCAGAACAGGGTCTAGACGGATCGTTCTTTGTAGCATTGAGGCTGCAAGTACGCCACATTGATGCTTTCCACAAATTC<br/> ATTACCAAGACATTTAA</p> |
| <p>HCT</p> <p>c78409.graph_c0</p> | <p>ATGGTGCCCGAAGTGGAAGTGCACTCCAAGGAGACCGTAAAGCCATCTTCTCCCACTCCAGACCACCTCCGTCGATA<br/> CCAGTTATCCTTTCTTGATCAAATATCTCCTCCAGTTTTTCATGCCCATGACCTTCTTCTACCCGCCAGACCCTGATAGCA<br/> GATTCAGCCACACAGACATATCAAACAAGCTTAAGCAATCTCTCTCTGAGAATCTAGTCCGGTTCTACCCGTTAGCAGG<br/> TCGGGTTAAGGACGGTTTTCTACGTCTCTGCAACGATGAGGGTGTGCCCTACATTGAAGCCAGAGTAAAGGGCCAAC<br/> TTCTGAGACGATCCGAGATCCAGCACCCAAAGAACTGCACAAATTCATCCATATCAACTGGATGATGTCAAAGACTT<br/> GA</p>                                                                                                                                                                                                                                                                                                                                                                                                                                                                                                                                                                                                                         |

|                             |                                                                                                                                                                                                                                                                                                                                                                                                                                                                                                                                                                                                                                                                                                                                                                                                                                                                                                                                                                                                                                                          |
|-----------------------------|----------------------------------------------------------------------------------------------------------------------------------------------------------------------------------------------------------------------------------------------------------------------------------------------------------------------------------------------------------------------------------------------------------------------------------------------------------------------------------------------------------------------------------------------------------------------------------------------------------------------------------------------------------------------------------------------------------------------------------------------------------------------------------------------------------------------------------------------------------------------------------------------------------------------------------------------------------------------------------------------------------------------------------------------------------|
| CSE<br><br>c100085.graph_c0 | ATGTCGTCGGACTCTGGAATTTTCGGCCAACTTCTGGGGCGATATGCCGGAGGAGGAGTACTATACCTCCCAAGGGGTG<br>CGCAACACCAAATCATACTTCGAAACCCCCACGGCAACCTCTTCACCCAGAGTTTCCTCCCTTTGGATCTCCCCATCA<br>AGGCCTCCGTCTACATGAGCCACGGCTACGGTTCCGACACCGGCTGGCTCTTCCAGAAGATCTGCATCAACTTCGCCT<br>CCTGGGGCTACGCCGTCTTCCCCGCCGACCTCCTCGGCCACGGCCGCTCCGACGGCCTCCGATGCTACCTCGGCGACA<br>TGGAGAAGGTCGCCGCCGCCTCCCTCTCCTTCTTCAAGAGCGTCCGCACCAGCGAGCCCTACCGCCACCTCCCCGCCT<br>TCCTCTTCGGCGAGTCCATGGGCGGAGCCGCCACCATGCTCATGTACTTCCAATCGGATCCGGATCTCTGGACCGGCCT<br>GGTCTTCTCAGCCCCACTCTTCGTGATTCCCGAGAACATGAAGCCATCGAAGGCCAGGCTGTTTCATGTACGGACTGTT<br>GTTTCGGGATGGCTGACACGTGGGCGACGATGCCGGACAACAAGATGGTCGGAAAGGCGATCAAGGATCCGGAGAAG<br>CTGAAGGTGATAGCGTCGAATCCACGGCGGTATACTGGTCCGCCGAGGGTGGGAACGATGCGGGAGCTGCTTAGGGT<br>GACCCAGCACATACAGGATAATTTCTCGAAGGTAACGGCGCCGTTCTTGACGGTGCACGGGACGGCGGACGGGGTGA<br>CATGTCCGACATCGTCGGAGCTGCTGTACGAGAAGGCATCGAGTGAGGACAAGACATTGAAGATGTACGAGGGGATG<br>TATCATTCGTTGATACAGGGAGAGACTGACGAGAATGCAAATCTGGTGTTGAAGGATATGAGGGAGTGGATTGATGCG<br>AGGGTTGAGAGATATGGACCCTACAAATCCTAG |
|-----------------------------|----------------------------------------------------------------------------------------------------------------------------------------------------------------------------------------------------------------------------------------------------------------------------------------------------------------------------------------------------------------------------------------------------------------------------------------------------------------------------------------------------------------------------------------------------------------------------------------------------------------------------------------------------------------------------------------------------------------------------------------------------------------------------------------------------------------------------------------------------------------------------------------------------------------------------------------------------------------------------------------------------------------------------------------------------------|
